# Supplementary material for: Clinical outcomes of a genomic screening program for actionable genetic conditions
Source: PubMed Central journal article supplement — Genet Med. 2020 Jun 30;22(11):1874–82. doi: 10.1038/s41436-020-0876-4 (PMC7605431; doi:10.1038/s41436-020-0876-4), 2020-06-30

## Supplementary Materials

|                                                                                                                        | <b>Page</b> |
|------------------------------------------------------------------------------------------------------------------------|-------------|
| <b>Supplementary Table 1:</b> Definitions of personal and family history features and relevant disease risk management | 2           |
| <b>Supplementary Table 2:</b> Type and stage of post-disclosure cancer or precancerous lesion diagnoses                | 4           |
| <b>Supplementary Figure 1:</b> MyCode Community Health Initiative recruitment brochure                                 | 5           |
| <b>Supplementary Figure 2:</b> Number of pathogenic and likely pathogenic (P/LP) variants identified per gene          | 7           |
| <b>Supplementary Figure 3:</b> Poster presentation at American College of Genetics & Genomics Annual Meeting           | 8           |

**Supplementary Table 1: Definitions of personal and family history features and relevant disease risk management**

| Condition (Gene(s))                                                 | Personal history                                            |                                                                                                                                                                                                                                                                                                                                                          |                                                                                                                                                                                                                                                                                                                                                                                                                                                                                                                                                                                                         | Family history                                              |                                                                                                                    |
|---------------------------------------------------------------------|-------------------------------------------------------------|----------------------------------------------------------------------------------------------------------------------------------------------------------------------------------------------------------------------------------------------------------------------------------------------------------------------------------------------------------|---------------------------------------------------------------------------------------------------------------------------------------------------------------------------------------------------------------------------------------------------------------------------------------------------------------------------------------------------------------------------------------------------------------------------------------------------------------------------------------------------------------------------------------------------------------------------------------------------------|-------------------------------------------------------------|--------------------------------------------------------------------------------------------------------------------|
|                                                                     | Clinical diagnosis                                          | Relevant pre- and post-disclosure diagnoses                                                                                                                                                                                                                                                                                                              | Relevant risk management                                                                                                                                                                                                                                                                                                                                                                                                                                                                                                                                                                                | Clinical diagnosis                                          | Suggestive history                                                                                                 |
| <i>Familial hypercholesterolemia (LDLR, APOB, PCSK9)</i>            | Familial hypercholesterolemia                               | LDL-C $\geq$ 190mg/dL treated or untreated<br>High cholesterol<br>Hypercholesterolemia<br>Dyslipidemia<br>Coronary artery disease<br>Medication list includes a lipid lowering therapy<br>Myocardial infarction<br>Peripheral vascular disease<br>Claudication<br>Atherosclerosis<br>Cerebrovascular disease<br>Xanthoma<br>Xanthelasma<br>Corneal Arcus | <u>Appointments</u><br>Cardiology appointment<br>Pharmacy FH discussion<br><u>Surveillance</u><br>Lipid panel<br>LDL Direct<br>Lipoprotein(a) measurement<br>Calcium Score<br>Stress Echocardiogram<br>Cardiac MRI<br>Carotid Ultrasound<br><u>Surgery</u><br>Percutaneous coronary intervention<br>Coronary artery bypass graft<br>Carotid endarterectomy<br><u>Medication initiation/change</u><br>Initiate lipid-lowering therapy (if not on in last year)<br>Increase dose of lipid-lowering therapy<br>Add additional drug to lipid-lowering therapy<br>Switch lipid-lowering therapy within class | Familial hypercholesterolemia                               | <u>1 FDR or 2 SDRs with:</u><br>High cholesterol and/or Coronary artery disease                                    |
| <i>Hereditary breast and ovarian cancer syndrome (BRCA1, BRCA2)</i> | Hereditary breast and ovarian cancer syndrome               | Breast cancer<br>Ovarian cancer<br>Pancreatic cancer<br>Melanoma<br>Prostate cancer                                                                                                                                                                                                                                                                      | <u>Appointments</u><br>Inherited risk breast cancer clinic<br><u>Surveillance</u><br>Mammography<br>Breast MRI<br>CA-125 testing<br>Transvaginal ultrasound<br>Prostate-specific antigen<br><u>Prophylactic surgery</u><br>Risk-reducing mastectomy<br>Risk-reducing salpingo-oophorectomy<br><u>Chemoprevention</u><br>tamoxifen<br>raloxifene                                                                                                                                                                                                                                                         | Hereditary breast and ovarian cancer syndrome               | <u>1 FDR or 2 SDRs with:</u><br>Breast cancer, Ovarian cancer, Pancreatic cancer, Melanoma, and/or Prostate cancer |
| <i>Lynch syndrome (MLH1, MSH2, MSH6, PMS2)</i>                      | Lynch syndrome (Hereditary Non-Polyposis Colorectal Cancer) | Colorectal cancer<br>Endometrial cancer<br>Gastric cancer<br>Ovarian cancer<br>Small bowel cancer                                                                                                                                                                                                                                                        | <u>Appointments</u><br>Inherited risk gastrointestinal clinic<br><u>Surveillance</u><br>Colonoscopy<br>Upper endoscopy                                                                                                                                                                                                                                                                                                                                                                                                                                                                                  | Lynch syndrome (Hereditary Non-Polyposis Colorectal Cancer) | <u>1 FDR or 2 SDRs with:</u><br>Colorectal cancer, Endometrial cancer, Gastric cancer, Ovarian cancer,             |

Outcomes of genomic screening program

|  |  |                                                                                                                      |                                                                                                 |  |                                                                                                                                                           |
|--|--|----------------------------------------------------------------------------------------------------------------------|-------------------------------------------------------------------------------------------------|--|-----------------------------------------------------------------------------------------------------------------------------------------------------------|
|  |  | Hepatobiliary tract cancer<br>Urinary tract cancer<br>Brain cancer<br>Sebaceous neoplasm<br>Gastrointestinal adenoma | <u>Prophylactic surgery</u><br>Prophylactic hysterectomy<br>Risk-reducing salpingo-oophorectomy |  | Small bowel cancer,<br>Hepatobiliary tract cancer,<br>Urinary tract cancer,<br>Brain cancer,<br>Sebaceous neoplasm,<br>and/or<br>Gastrointestinal adenoma |
|--|--|----------------------------------------------------------------------------------------------------------------------|-------------------------------------------------------------------------------------------------|--|-----------------------------------------------------------------------------------------------------------------------------------------------------------|

FDR=first-degree relative; SDR=second-degree relative, MRI=magnetic resonance imaging

**Supplementary Table 2: Type and stage of post-disclosure cancer or precancerous lesion diagnoses**

| Condition | Gene         | Cancer/Lesion Type        | Stage/Notes                                                                      |
|-----------|--------------|---------------------------|----------------------------------------------------------------------------------|
| HBOC      | <i>BRCA1</i> | Fallopian tube cancer     | IC                                                                               |
| HBOC      | <i>BRCA1</i> | STIC lesion               | N/A                                                                              |
| HBOC      | <i>BRCA2</i> | Breast cancer             | DCIS                                                                             |
| HBOC      | <i>BRCA2</i> | Breast cancer             | DCIS                                                                             |
| HBOC      | <i>BRCA2</i> | Breast cancer             | IC                                                                               |
| HBOC      | <i>BRCA2</i> | Bilateral breast cancer   | DCIS (bilateral)                                                                 |
| HBOC      | <i>BRCA2</i> | Ampulla of Vater cancer   | IIB                                                                              |
| HBOC      | <i>BRCA2</i> | Prostate cancer           | cT1c                                                                             |
| HBOC      | <i>BRCA2</i> | Prostate cancer           | cT1c                                                                             |
| HBOC      | <i>BRCA2</i> | Prostate cancer           | IIA                                                                              |
| Lynch     | <i>MSH2</i>  | sebaceous adenomas (2)    | Absent expression of MSH2/MSH6 proteins on immunohistochemistry in both adenomas |
| Lynch     | <i>MSH2</i>  | tubular adenoma (1)       | no high-grade dysplasia                                                          |
| Lynch     | <i>MSH6</i>  | tubulovillous adenoma (1) | no high-grade dysplasia                                                          |
| Lynch     | <i>PMS2</i>  | tubular adenomas (2)      | no high-grade dysplasia                                                          |
| Lynch     | <i>PMS2</i>  | tubular adenomas (2)      | no high-grade dysplasia                                                          |

HBOC=hereditary breast and ovarian cancer syndrome; STIC=serous tubal intraepithelial carcinoma; DCIS=ductal carcinoma in situ

Supplementary Figure 1: MyCode Community Health Initiative recruitment brochure

Geisinger  
mycode

Advancing healthcare  
for everybody

The MyCode  
Community Health Initiative

Geisinger  
mycode

go.geisinger.org/MyCode

Caring

## Be a part of something big

Geisinger is nationally recognized for its innovative approaches to improving the health of populations. MyCode is no exception. The MyCode® Community Health Initiative began in 2007 with the crucial support of the Geisinger patient community. This project holds the promise of new discoveries and treatments for serious chronic medical conditions that can affect our children, families, friends and communities.

If you decide to participate, you'll be joining hundreds of thousands of your friends and neighbors in an effort that may lead to better health for generations to come.

MyCode is a research study. Like all research studies that involve human subjects, there are some minor risks. We are happy to talk with you about the benefits and risks of joining.

### Questions? Contact us.

Email: [JoinMyCode@geisinger.org](mailto:JoinMyCode@geisinger.org)

Visit [go.geisinger.org/MyCode](http://go.geisinger.org/MyCode) or call toll free **855-636-0019** to find out more about participating.

## What is MyCode?

MyCode is a Geisinger Precision Health project seeking new ways to improve the prevention, diagnosis, and management of disease.

## Who is eligible?

All patients of Geisinger or Geisinger-affiliated hospitals and practices are invited to participate.

## Will I learn anything?

Most people will not directly benefit from participating. However, up to 5 percent of MyCode participants will be contacted and told they have genetic changes that may indicate a higher risk for certain diseases and cancers. And even if you don't learn anything about your specific genes, all MyCode participants are contributing to our project goals of understanding the connection between genes and health.

## Will Geisinger protect my privacy?

All MyCode data and samples are protected and confidential, according to Geisinger's strict privacy standards and HIPAA regulations. Your sample may be shared with Geisinger researchers and with Geisinger partners. No information that can identify you will be shared, and these researchers will not contact you directly.

## What if I am concerned about my family history and genetics?

Ask your regular healthcare provider about Geisinger's genetic counseling services. He or she will discuss with you how to get appropriate screening and treatment if you have any concerns about family history or genetic illnesses.

Participating is easy. Talk to your healthcare provider today!

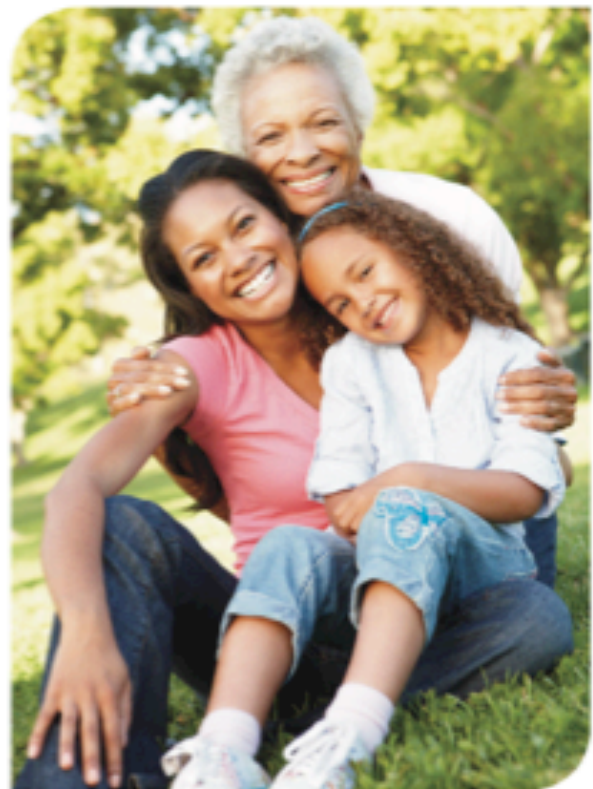

Supplementary Figure 2: Number of pathogenic and likely pathogenic (P/LP) variants identified per gene

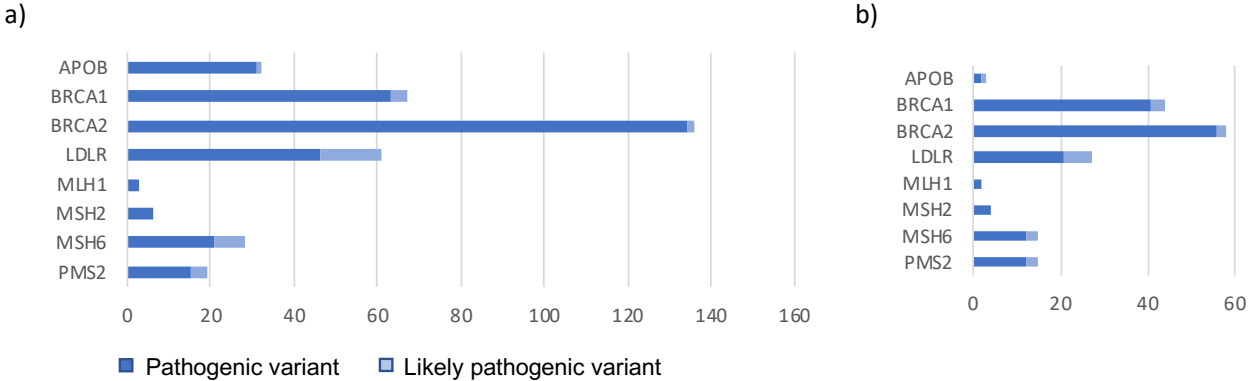

a) study participants with a P/LP variant per gene; b) unique P/LP variants per gene in study participants

# Impact of a Population Genomic Screening & Counseling Program on Risk Management Performance & Disease Diagnosis

Buchanan AH\*, Schwartz MLB, Kirchner HL, Schmidlen T, Hallquist MLG, Rocha H, Kelly MA, McMinn M, Schwiter R, Loehr FW, Butry L, Lazzeri A, Frisbie L, Rahm AK, Williams MS, Sturm AC

Geisinger, Danville, PA

\*ahbuchanan@geisinger.edu; @AdamBuchanan76

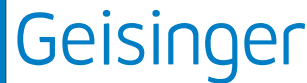

## Background

- Population screening for genomic variants in CDC Tier 1 conditions can identify individuals at risk for preventable conditions who otherwise might not come to clinical attention prior to disease manifestation
- It is unclear whether genomic information found via screening guides care and reduces disease risk
- We reviewed EHR data for patients who received Tier 1 results via a genomic screening program in Geisinger's MyCode Community Health Initiative

## Conclusions

**A genomic screening program effectively identified previously undetected individuals at risk for hereditary cancer and heart disease**

- Nearly 90% of individuals with a Tier 1 variant detected via genomic screening were previously unaware of their variant
- Yet, most of these had relevant personal and/or family history
- Two-thirds of patients subsequently performed disease risk management
- Rates of relevant history and post-disclosure risk management differed by Tier 1 condition
- More than 10% were diagnosed with pre-cancerous lesion, early-stage cancer, or atherosclerotic disease *after* disclosure of genomic result
- Post-disclosure genetic counseling was significantly associated with performing recommended risk management

## Methods

- MyCode participants' exome data reviewed for Tier 1 gene variants expected to be pathogenic (P) or likely pathogenic (LP)
- Variants confirmed in CLIA-certified laboratory, uploaded to electronic health record (EHR), & disclosed to patient-participants & their providers
- Study team reviewed EHR for percentage who:
  - were **not previously aware** of gene variant;
  - performed recommended **disease risk management post-disclosure** of genomic result (among those eligible by age, sex & previous treatment); &
  - had a **new diagnosis of relevant disease** post-disclosure

## Results

- 1,061 of 64,394 MyCode participants (1.6%) received clinical report of P/LP variant in an actionable gene from May 2015-March 2019
- 512 of these (0.8%) had a Tier 1 gene result
- Chart reviews completed on 352 patients who received a Tier 1 result prior to February 2018
- 54% female, 99% European ancestry, 99% non-Hispanic ethnicity, median age of 63 years
- Median of 21.8 months from results disclosure to EHR review
- 13% of patients (n=46) already aware of their genomic result via clinical genetic testing prior to MyCode disclosure

### Relevant personal & family history in EHR among patients *without* prior genetic diagnosis

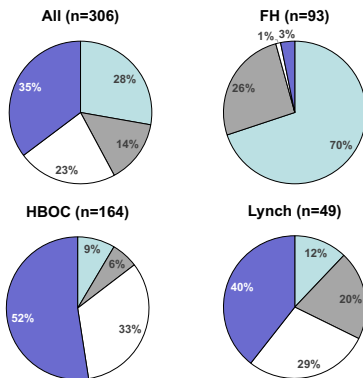

Legend: Personal & family hx (dark blue), Personal hx only (medium blue), Family hx only (light blue), No personal or family hx (white)

## Results

### Risk management performance & post-disclosure diagnoses among eligible patients *without* prior genetic diagnosis

|                                              | FH (n=93)     | HBOC (n=164)    | Lynch (n=49)  | All (n=306)     |
|----------------------------------------------|---------------|-----------------|---------------|-----------------|
| Risk Management Eligible <sup>1</sup>        | 93/93 (100%)  | 121/164 (73.8%) | 49/49 (100%)  | 263/306 (86.0%) |
| Risk Management Pre-Disclosure <sup>2</sup>  | 69/93 (74.2%) | 34/121 (28.1%)  | 30/49 (61.2%) | 133/263 (50.6%) |
| Risk Management Post-Disclosure <sup>3</sup> | 78/93 (83.9%) | 75/121 (62.0%)  | 27/49 (55.1%) | 180/263 (68.4%) |
| New Diagnosis <sup>4</sup>                   | 26/93 (28.0%) | 10/164 (6.1%)   | 5/49 (10.2%)  | 41/306 (13.4%)  |

<sup>1</sup>Eligible by age, sex & previous treatment to perform recommended risk management; <sup>2</sup>Performed risk management within recommended interval *prior* to disclosure; <sup>3</sup>Performed risk management *after* disclosure; <sup>4</sup>New diagnosis of relevant disease *after* disclosure

### Post-disclosure diagnoses by condition (# patients)

| FH (n=26)                                    | HBOC (n=10)*                | Lynch (n=5)           |
|----------------------------------------------|-----------------------------|-----------------------|
| LDL-C >190 mg/dL (20)                        | Breast cancer (4)           | Colon adenoma (4)     |
| Atherosclerosis (5)                          | Prostate cancer (3)         | Sebaceous adenoma (1) |
| Claudication/peripheral vascular disease (4) | Fallopian tube cancer (1)   |                       |
| Corneal arcus (4)                            | STIC lesion (1)             |                       |
| Xanthoma/xanthelasma (3)                     | Ampulla of Vater cancer (1) |                       |
| Cerebrovascular accident (2)                 |                             |                       |

\*All tumors stage IIA or earlier; STIC=serous tubal intraepithelial carcinoma

### Variables significantly associated with post-disclosure risk management performance (logistic regression)

|                                    | OR (95% CI), p-value       |
|------------------------------------|----------------------------|
| Genetic counseling post-disclosure | 2.59 (1.39, 4.80), p=0.003 |
| Tier 1 Condition                   |                            |
| HBOC                               | Ref                        |
| FH                                 | 0.86 (0.26, 2.86)          |
| Lynch                              | 0.27 (0.11, 0.64), p=0.007 |
| Pre-disclosure risk management     | 4.27 (2.08, 8.74), p<0.001 |

## Acknowledgements

Authors thank MyCode patient-participants, MyCode precision health associates and MyCode Genomic Screening & Counseling program. Funding provided by Geisinger Research.

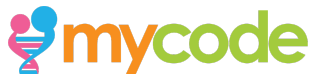

Supplement: 41436_2020_876_MOESM1_ESM.pdf [file 41436_2020_876_MOESM1_ESM.pdf]
